# Supplementary material for: Effect of PCL end-groups on the self-assembly process of Pluronic in aqueous media
Source: Royal Society of Chemistry journal article supplement (doi:10.1039/c7cp07240f), 2018-01-01
Supplement: c7cp07240f1.pdf [file c7cp07240f1.pdf]

Supplementary information:

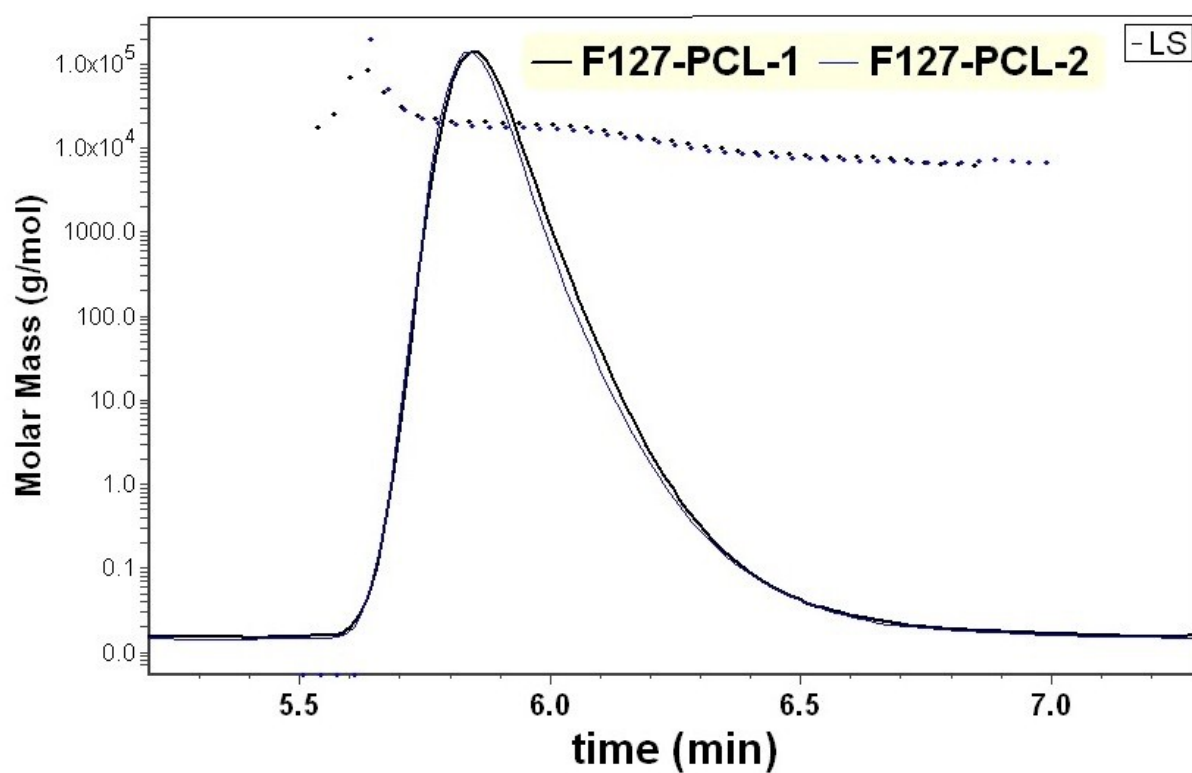

**Fig.-S1.** GPC Chromatograms for the two Pluronic/PCL samples. F127-PCL-1,  $n=11$  with short name PCL(11) and F127-PCL-2,  $n=5$  with short name PCL(5).

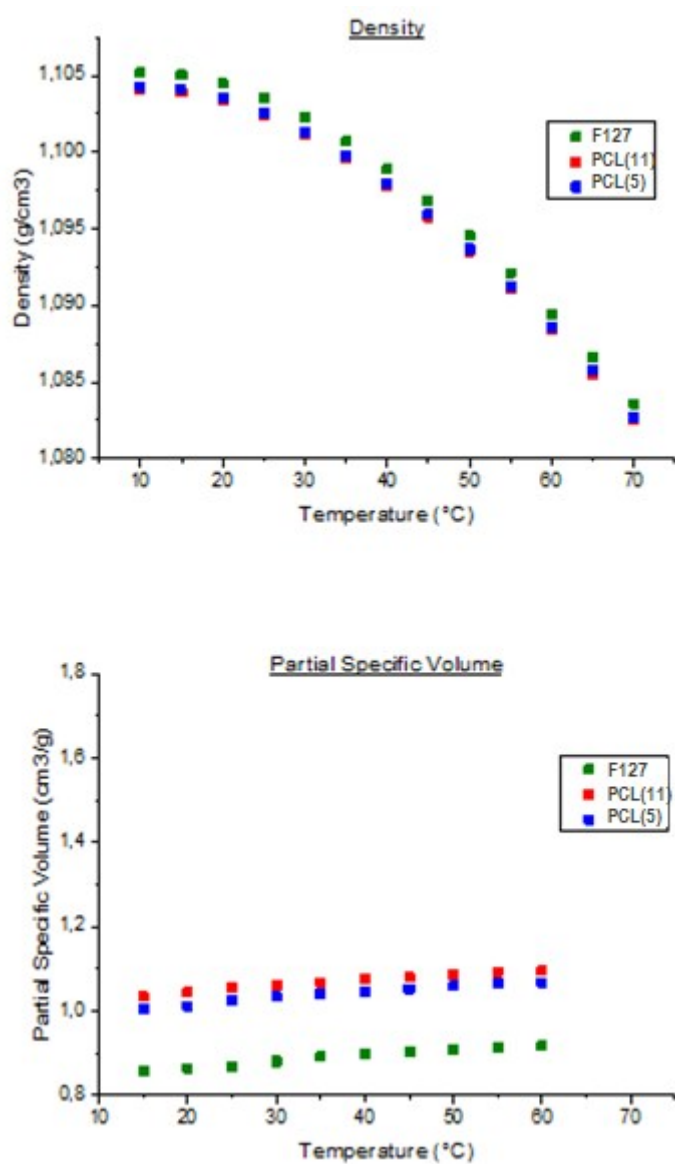

**Fig.-S2.** Measurements of density and partial specific volume on 0.5 wt% solutions of the modified and unmodified copolymers as a function of temperature. This information about the copolymers is used in the analysis of the SANS data.

### Cylinder model for SANS data

The measured intensity is related to the form factor normalized by the particle volume as

$$I(q, \alpha) = \frac{scale}{V_s} F^2(q, \alpha) \cdot \sin(\alpha) + background$$

where

$$F(q, \alpha) = (\rho_c - \rho_s) V_c \frac{\sin\left(q \frac{1}{2} L \cos \alpha\right)}{q \frac{1}{2} L \cos \alpha} \frac{2J_1(qR \sin \alpha)}{qR \sin \alpha} +$$
$$(\rho_s - \rho_{solv}) V_s \frac{\sin\left(q\left(\frac{1}{2}L + T\right) \cos \alpha\right)}{q\left(\frac{1}{2}L + T\right) \cos \alpha} \frac{2J_1(q(R + T) \sin \alpha)}{q(R + T) \sin \alpha}$$

and

$$V_s = \pi(R + T)^2(L + 2T)$$

Here  $\alpha$  is the angle between the axis of the cylinder and the q-vector.  $V_s$  is the volume of the outer shell (i.e. the total volume, including the shell),  $V_c$  is the volume of the core,  $L$  is the length of the core,  $R$  is the radius of the core,  $T$  is the thickness of the shell,  $\rho_c$  is the scattering length density of the core,  $\rho_s$  is the scattering length density of the shell,  $\rho_{solv}$  is the scattering length density of the solvent, and *background* is the background level. The outer radius of the shell is given by  $R+T$  and the total length of the outer shell is given by  $L+2T$ .  $J_1$  is the first order Bessel function.
